# Supplementary material for: Obeticholic acid protects against hepatocyte death and liver fibrosis in a murine model of nonalcoholic steatohepatitis
Source: Sci Rep. 2018 May 25;8:8157. doi: 10.1038/s41598-018-26383-8 (PMC5970222; doi:10.1038/s41598-018-26383-8)
Supplement: Supplementary file 1 — Supplementary information [file 41598_2018_26383_MOESM1_ESM.pdf]

**Obeticholic acid protects against hepatocyte death and liver fibrosis in a murine model of nonalcoholic steatohepatitis**

**Authors:**

Toshihiro Goto<sup>1,2</sup>, Michiko Itoh<sup>3</sup>, Takayoshi Suganami<sup>4\*</sup>, Sayaka Kanai<sup>5</sup>, Ibuki Shirakawa<sup>3</sup>, Takeru Sakai<sup>1</sup>, Masahiro Asakawa<sup>1</sup>, Toshihiro Yoneyama<sup>6</sup>, Toshihiro Kai<sup>6</sup>, Yoshihiro Ogawa<sup>1,4,5,7,8\*</sup>

**Institutional affiliation:**

<sup>1</sup>Department of Molecular Endocrinology and Metabolism, Graduate School of Medical and Dental Sciences, Tokyo Medical and Dental University, Tokyo, Japan; <sup>2</sup>Specialty Medicine Group Drug Development Research Laboratories Sumitomo Dainippon Pharma. Co., Ltd., Osaka, Japan; <sup>3</sup>Department of Organ Network and Metabolism, Graduate School of Medical and Dental Sciences, Tokyo Medical and Dental University, Tokyo, Japan; <sup>4</sup>Department of Molecular Medicine and Metabolism, Research Institute of Environmental Medicine, Nagoya University, Nagoya, Japan; <sup>5</sup>Department of Molecular and Cellular Metabolism, Graduate School of Medical and Dental Sciences, Tokyo Medical and Dental University, Tokyo, Japan; <sup>6</sup>Omics Group, Genomic Science Laboratories, Sumitomo Dainippon Pharma. Co., Ltd., Osaka, Japan; <sup>7</sup>Department of Medicine and Bioregulatory Science, Graduate School of Medical Sciences, Kyushu University, Fukuoka, Japan; <sup>8</sup>Japan Agency for Medical Research and Development, CREST, Tokyo, Japan. <sup>9</sup>T.G. and M.I. contributed equally to this work and share the first authorship.

## **Supplementary materials**

### **Supplementary method**

#### **Western blotting**

Nuclear proteins were extracted using NE-PER Nuclear and Cytoplasmic Extraction Reagents (Thermo Fisher Scientific, San Jose, CA, USA) supplemented with Halt Protease and Phosphatase Inhibitor Cocktail and sodium butyrate. Proteins were separated by SDS-PAGE and immunoblotted with antibodies against MDM2 (ab16895, abcam), phospho-p53 (Ser15) (9284, Cell Signaling) and acetyl-p53 (Lys379) (2570, Cell Signaling), and Lamin A/C (sc-20168, Santa Cruz).

**Supplementary Table S1. Primers used in the present study**

| <i>Genes</i>  | Primers | Primers                  |
|---------------|---------|--------------------------|
| <i>Abcb11</i> | Forward | GTCTGACTCAGTGATTCTTCGC   |
|               | Reverse | GAGCAATGCGCACACACTTC     |
| <i>Apaf1</i>  | Forward | CTCTAGATGAAGCCATGTCTG    |
|               | Reverse | AAGGATGGAAAGGTCTGTGT     |
| <i>Ccl2</i>   | Forward | CCACTCACCTGCTGCTACTCAT   |
|               | Reverse | TGGTGATCCTCTTGCTAGCTCTCC |
| <i>Colla1</i> | Forward | CCTCAGGGTATTGCTGGACAAC   |
|               | Reverse | ACCACTTGATCCAGAAGGACCTT  |
| <i>Col4a1</i> | Forward | TCCATGGCACCCATCTCTG      |
|               | Reverse | CTTCACAAACCGCACACCTG     |
| <i>Ctgf</i>   | Forward | CTTCTGCGATTTCGGCTCC      |
|               | Reverse | TACACCGACCCACCGAAGA      |
| <i>Cyp7a1</i> | Forward | CTGATCCGTCTACGCATGTTTC   |
|               | Reverse | CAGGAATGGTGTTTGCTTGAGA   |
| <i>Cyp8b1</i> | Forward | ACGCTTCCTCTATCGCCTGAA    |
|               | Reverse | GTGCCTCAGAGCCAGAGGAT     |
| <i>Emr1</i>   | Forward | CTTTGGCTATGGGCTTCCAGT    |
|               | Reverse | GCAAGGAGGACAGAGTTTATCGTG |
| <i>Mdm2</i>   | Forward | AAGGAGGAAACGCAGGACAA     |
|               | Reverse | TCTTGCCGTGAACAATGCA      |
| <i>Nr0b2</i>  | Forward | AAGGGCACGATCCTCTTCAA     |
|               | Reverse | GTACCAGGGCTCCAAGACT      |
| <i>Nr1h4</i>  | Forward | AGGCCATGTTTCTTCGTTCG     |
|               | Reverse | CATGACCGGCAGGAAGTTTC     |

|                |         |                                 |
|----------------|---------|---------------------------------|
| <i>P21</i>     | Forward | AACATCTCAGGGCCGAAAAC            |
|                | Reverse | CTGCGCTTGGAGTGATAGAA            |
| <i>Slc51b</i>  | Forward | GACAAGCATGTTCTCCTGAG            |
|                | Reverse | GATGCAGGTCTTCTGGTGTTTC          |
| <i>Srebflc</i> | Forward | AGCTGTCGGGGTAGCGTCTG            |
|                | Reverse | GAGAGTTGGCACCTGGGCTG            |
| <i>Tgfb1</i>   | Forward | CCTGAGTGGCTGTCTTTTGACG          |
|                | Reverse | AGTGAGCGCTGAATCGAAAGC           |
| <i>Timp1</i>   | Forward | CATCACGGGCCGCCTA                |
|                | Reverse | AAGCTGCAGGCACTGATGTG            |
| <i>Tnfa</i>    | Forward | ACCCTCACACTCAGATCATCTTC         |
|                | Reverse | TGGTGGTTTGCTACGACGT             |
| <i>Tnfs10b</i> | Forward | TGCTGCTCAAGTGGCGC               |
|                | Reverse | GGCATCCAGCAGATGGTTG             |
| <i>Tp53</i>    | Forward | CTCAAAAAACTTACCAGGGC            |
|                | Reverse | CACCACGCTGTGGCGAAAAGTCTG        |
| <i>Vcam1</i>   | Forward | TCACAATTAAGAAGTTTAACACTTGATGTAA |
|                | Reverse | GAGTGCAAGGAGTTCGGGC             |
| <i>36B4</i>    | Forward | GGCCCTGCACTCTCGCTTTC            |
|                | Reverse | TGCCAGGACGCGCTTGT               |

**Supplementary Table S2. Effect of OCA treatment on total bile acid in MC4R-KO fed WD for 24 weeks.**

|                                             | WT-SD   | MC4R-WD |      |
|---------------------------------------------|---------|---------|------|
|                                             | Vehicle | Vehicle | OCA  |
| Serum bile acid ( $\mu\text{mol/L}$ )       | 3.69    | 21.25   | 2.33 |
| Liver bile acid ( $\mu\text{mol/g}$ tissue) | 0.16    | 0.34    | 0.11 |
| Ileum bile acid ( $\mu\text{mol/g}$ tissue) | 0.62    | 2.13    | 0.73 |

Serum and tissue bile acid levels were measured using samples pooled from 6 mice for WT-SD, 10 mice for vehicle-treated MC4R-WD, 9 mice for OCA-treated MC4R-WD.

**Supplementary Table S3. Effect of OCA on hepatic bile acid composition (%) in MC4R-KO fed WD for 24 weeks.**

|                  | WT-SD   | MC4R-WD |      |
|------------------|---------|---------|------|
|                  | Vehicle | Vehicle | OCA  |
| TCA              | 30.4    | 40.2    | 10.1 |
| CA               | 0.8     | 0.4     | 0.0  |
| TCDCa            | 2.4     | 3.2     | 6.5  |
| CDCA             | 0.1     | 0.0     | 0.0  |
| GUDCA            | 0.0     | 0.0     | 0.0  |
| TUDCA            | 2.3     | 3.7     | 10.7 |
| UDCA             | 0.2     | 0.1     | 0.8  |
| TDCA             | 4.7     | 0.7     | 0.0  |
| DCA              | 0.0     | 0.0     | 0.0  |
| THCA             | 2.3     | 0.7     | 0.9  |
| HCA              | 0.0     | 0.0     | 0.0  |
| TLCA             | 0.0     | 0.0     | 0.0  |
| LCA              | 0.0     | 0.0     | 0.0  |
| T- $\alpha$ -MCA | 3.0     | 5.9     | 7.2  |
| $\alpha$ -MCA    | 0.7     | 0.4     | 0.8  |
| T- $\beta$ -MCA  | 22.8    | 32.2    | 40.0 |
| $\beta$ -MCA     | 12.7    | 6.1     | 12.0 |
| T- $\omega$ -MCA | 11.1    | 5.2     | 7.7  |
| $\omega$ -MCA    | 3.5     | 0.6     | 1.4  |

CA, cholic acid; TCA, tauro-CA; CDCA, chenodeoxycholic acid; TCDCa, tauro-CDCA;

UDCA, ursodeoxycholic acid; GUDCA, glycol-UDCA; TUDCA, tauro-UDCA; DCA, deoxycholic acid; TDCA, tauro-DCA; HCA, hyocholic acid; THCA, tauro-HCA; LCA, lithocholic acid; TLCA, tauro-LCA;  $\alpha/\beta/\omega$ -MCA,  $\alpha/\beta/\omega$ -muricholic acid; T- $\alpha/\beta/\omega$ -MCA, tauro- $\alpha/\beta/\omega$ -MCA. Hepatic bile acid composition was measured using samples pooled from 6 mice for WT-SD, 10 mice for vehicle-treated MC4R-WD, 9 mice for OCA-treated MC4R-WD.

**Supplementary Table S4. Serological parameters of MC4R-KO treated with OCA for 4 or 8 weeks after the development of NASH.**

| Weeks                          | MC4R-WD                    |               |                           |              |                            |
|--------------------------------|----------------------------|---------------|---------------------------|--------------|----------------------------|
|                                | -                          | Vehicle       | OCA                       | Vehicle      | OCA                        |
|                                | 0                          | 4             | 4                         | 8            | 8                          |
| BG ( <i>ad lib</i> ,<br>mg/dL) | 149.6 ± 9.4                | 150.0 ± 7.0   | 167.9 ± 8.6               | 152.1 ± 12.4 | 179.2 ± 9.2                |
| TC<br>(mg/dL)                  | 320.6 ± 11.3 <sup>##</sup> | 328.0 ± 27.4  | 263.0 ± 11.0 <sup>*</sup> | 336.3 ± 8.8  | 270.9 ± 19.3 <sup>**</sup> |
| TG<br>(mg/dL)                  | 60.4 ± 7.1                 | 78.8 ± 11.4   | 56.5 ± 7.2                | 56.3 ± 4.8   | 52.7 ± 6.3                 |
| NEFA<br>(mEq/L)                | 0.96 ± 0.74                | 0.81 ± 0.40   | 0.66 ± 0.32               | 0.72 ± 0.62  | 0.73 ± 0.50                |
| ALT<br>(U/L)                   | 344.6 ± 26.4 <sup>##</sup> | 499.5 ± 104.5 | 323.8 ± 52.2              | 700.0 ± 92.2 | 323.6 ± 55.0 <sup>**</sup> |
| AST<br>(U/L)                   | 417.0 ± 45.3 <sup>##</sup> | 426.5 ± 53.6  | 329.3 ± 62.1              | 580.0 ± 63.2 | 300.9 ± 33.6 <sup>**</sup> |
| VCAM-1<br>(µg/mL)              | 1.37 ± 0.05 <sup>##</sup>  | 1.43 ± 0.06   | 1.21 ± 0.03 <sup>**</sup> | 1.38 ± 0.07  | 1.19 ± 0.06                |

VCAM-1, vascular cell adhesion molecule-1; -, no treatment. Data are expressed as the mean ± SE. n = 5-10. <sup>#</sup>*p* < 0.05, <sup>##</sup>*p* < 0.01 MC4R-WD (pre-treatment) group vs. WT-SD group, <sup>\*</sup>*p* < 0.05, <sup>\*\*</sup>*p* < 0.01 vs. MC4R-WD group treated with the vehicle.

## Supplementary Figures

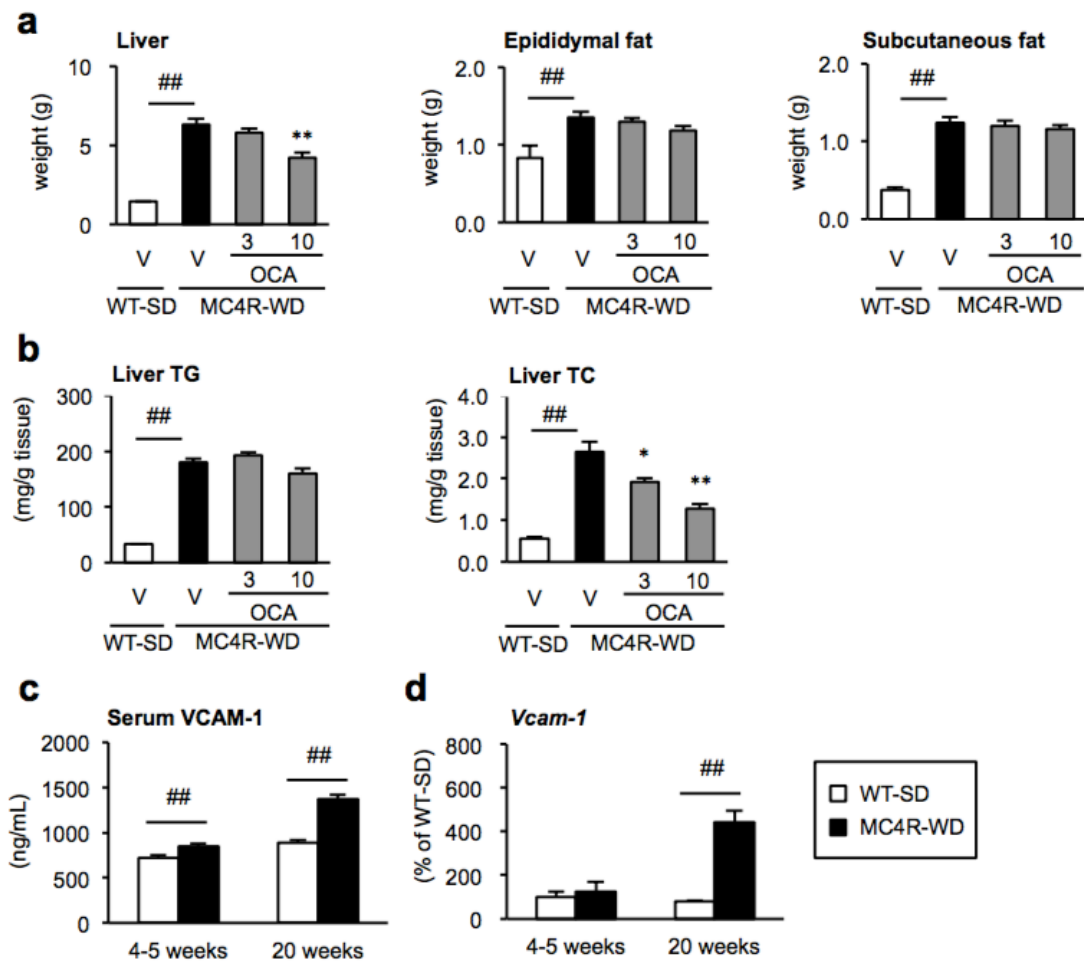

**Supplementary Figure S1. Effect of OCA on tissue weight and liver triglyceride and cholesterol levels in MC4R-KO mice.**

(a) Body weight and liver, subcutaneous and epididymal adipose tissue weights in MC4R-KO and WT mice. (b) Liver triglyceride (TG) and total cholesterol (TC) levels at 24 weeks. (c) Serum soluble vascular cell adhesion molecule-1 (VCAM-1) concentrations and (d) hepatic mRNA expression levels of VCAM-1 in MC4R-KO mice fed WD for 4-5 weeks or 20 weeks compared to age-matched WT mice fed SD. V, Vehicle.  $^{##}p < 0.01$ ;  $^{*}p < 0.05$ ,  $^{**}p < 0.01$  vs. the vehicle-treated MC4R-WD group.

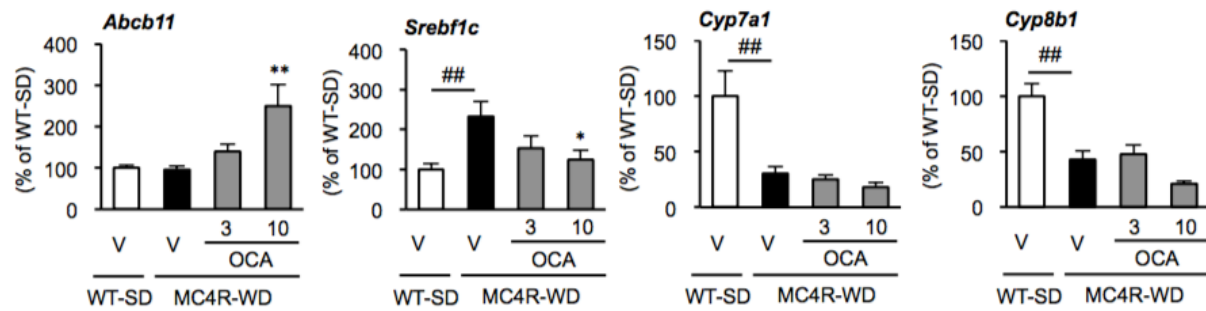

**Supplementary Figure S2. Hepatic mRNA expression of FXR-regulated genes after 24-week OCA treatment.**

Hepatic mRNA expression levels of ATP-binding cassette subfamily B member 11 (*Abcb11*), sterol regulatory element binding protein 1c (*Srebf1c*), cytochrome P450 7A1 (*Cyp7a1*) and cytochrome P450 8b1 (*Cyp8b1*) after treatment with OCA for 24 weeks. <sup>##</sup>*p* < 0.01; <sup>\*\*</sup>*p* < 0.01 vs. vehicle-treated MC4R-WD group. Vehicle-treated WT-SD group, *n* = 7; vehicle-treated MC4R-WD group, *n* = 10; 3 and 10 mg/kg of OCA-treated MC4R-WD group, *n* = 10 and *n* = 9, respectively.

**a**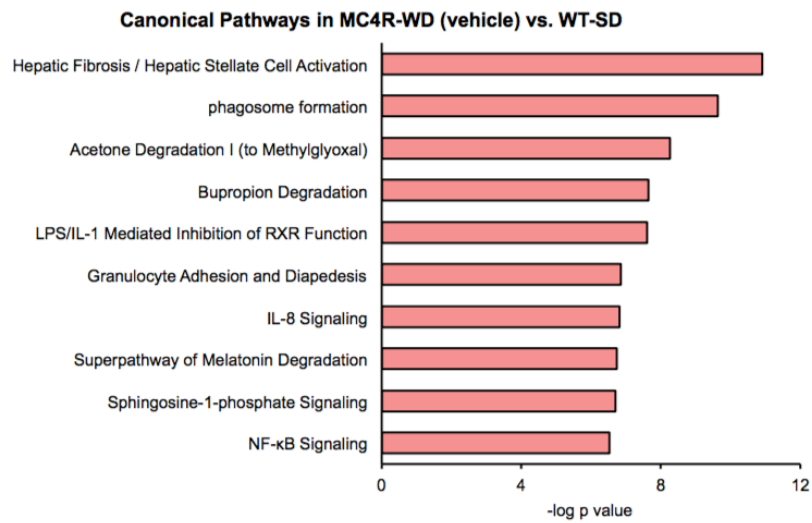**b**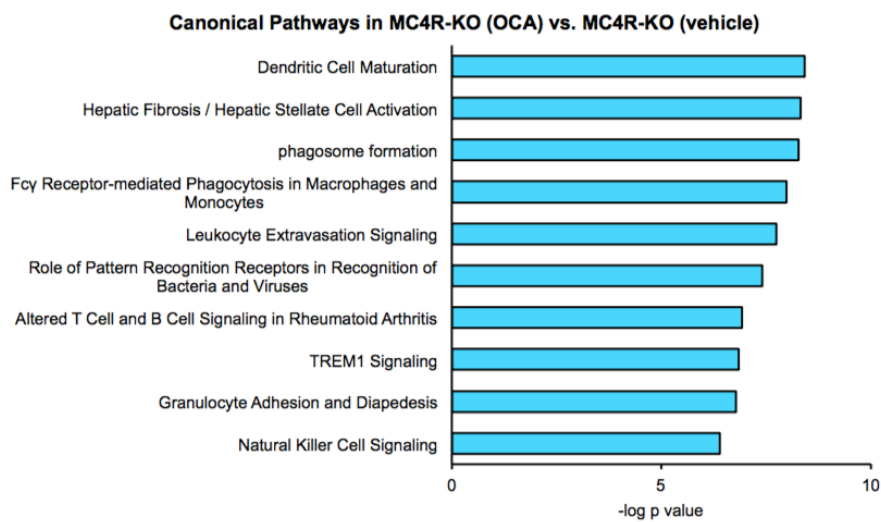

### Supplementary Figure S3. Effect of OCA on canonical pathways in NASH.

Ingenuity Pathway Analysis of top 10 canonical pathways for (a) vehicle-treated WT-SD group vs. vehicle-treated MC4R-WD group and (b) vehicle-treated MC4R-WD group vs. OCA-treated MC4R-WD group.

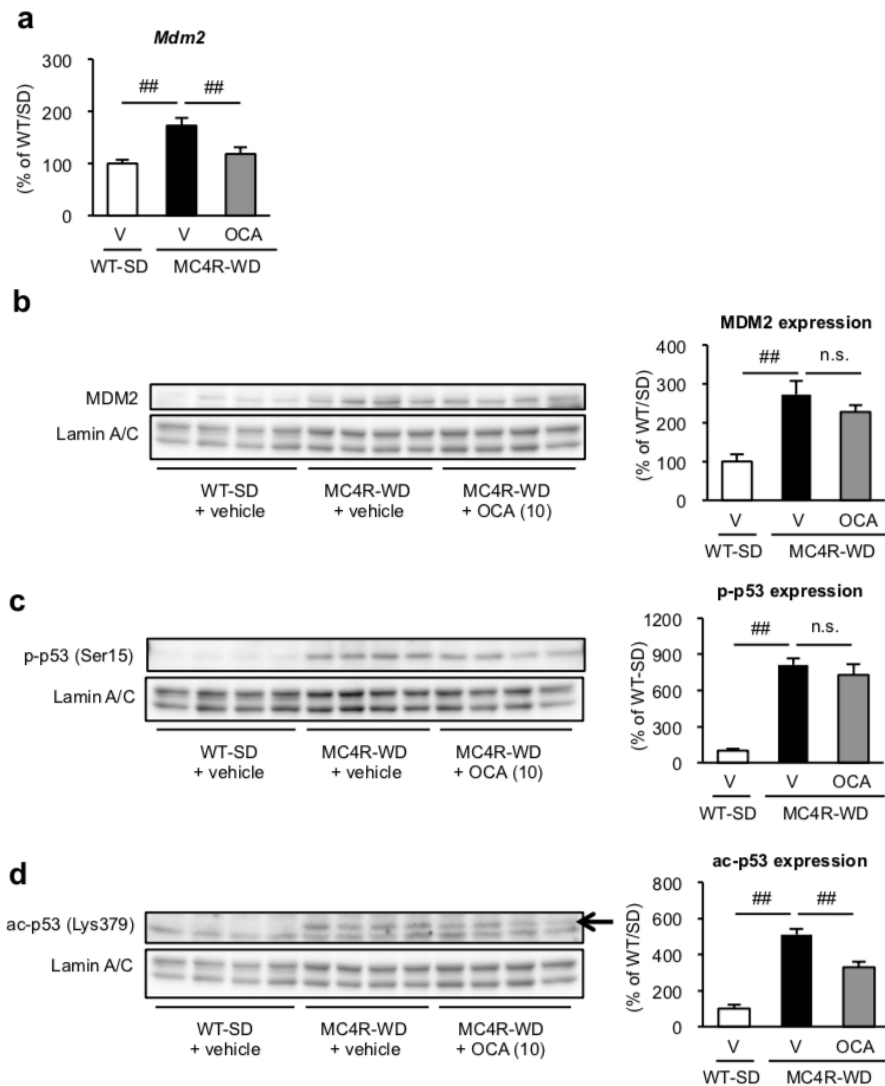

### Supplementary Figure S4. Effect of OCA on modification status of p53 in the liver.

(a) Hepatic mRNA expression levels of *Mdm2*. Vehicle-treated WT-SD group,  $n = 7$ ; vehicle-treated MC4R-WD group,  $n = 10$ ; 10 mg/kg OCA-treated MC4R-WD group,  $n = 9$ . Nuclear protein levels of MDM2 (b), phospho-p53 (Ser15) (c) and acetyl-p53 (Lys379) (d).  $n = 4$ . ##  $p < 0.01$ , n.s., not significant.

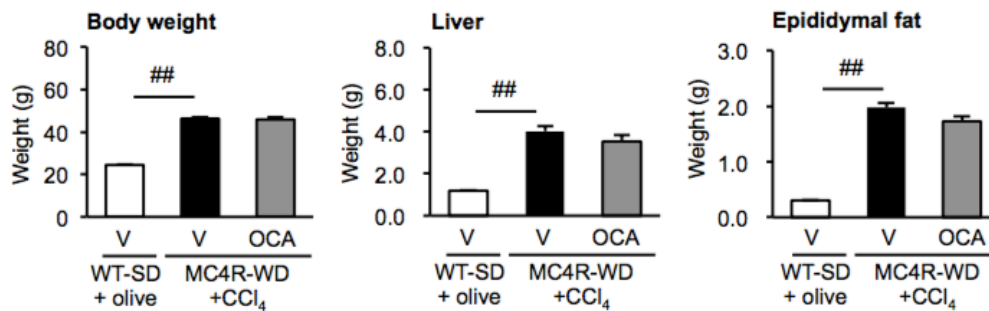

**Supplementary Figure S5. Effect of OCA on body and tissue weights in the inducible NASH model.**

Body, liver and epididymal fat weights 7 days after CCl<sub>4</sub> injection. V, Vehicle. <sup>#</sup> $p < 0.05$ , <sup>##</sup> $p < 0.01$ . Vehicle-treated WT-SD group with olive oil injection,  $n = 10$ ; vehicle-treated MC4R-WD group with CCl<sub>4</sub> injection,  $n = 10$ ; OCA (10 mg/kg)-treated MC4R-WD group with CCl<sub>4</sub> injection,  $n = 10$ .

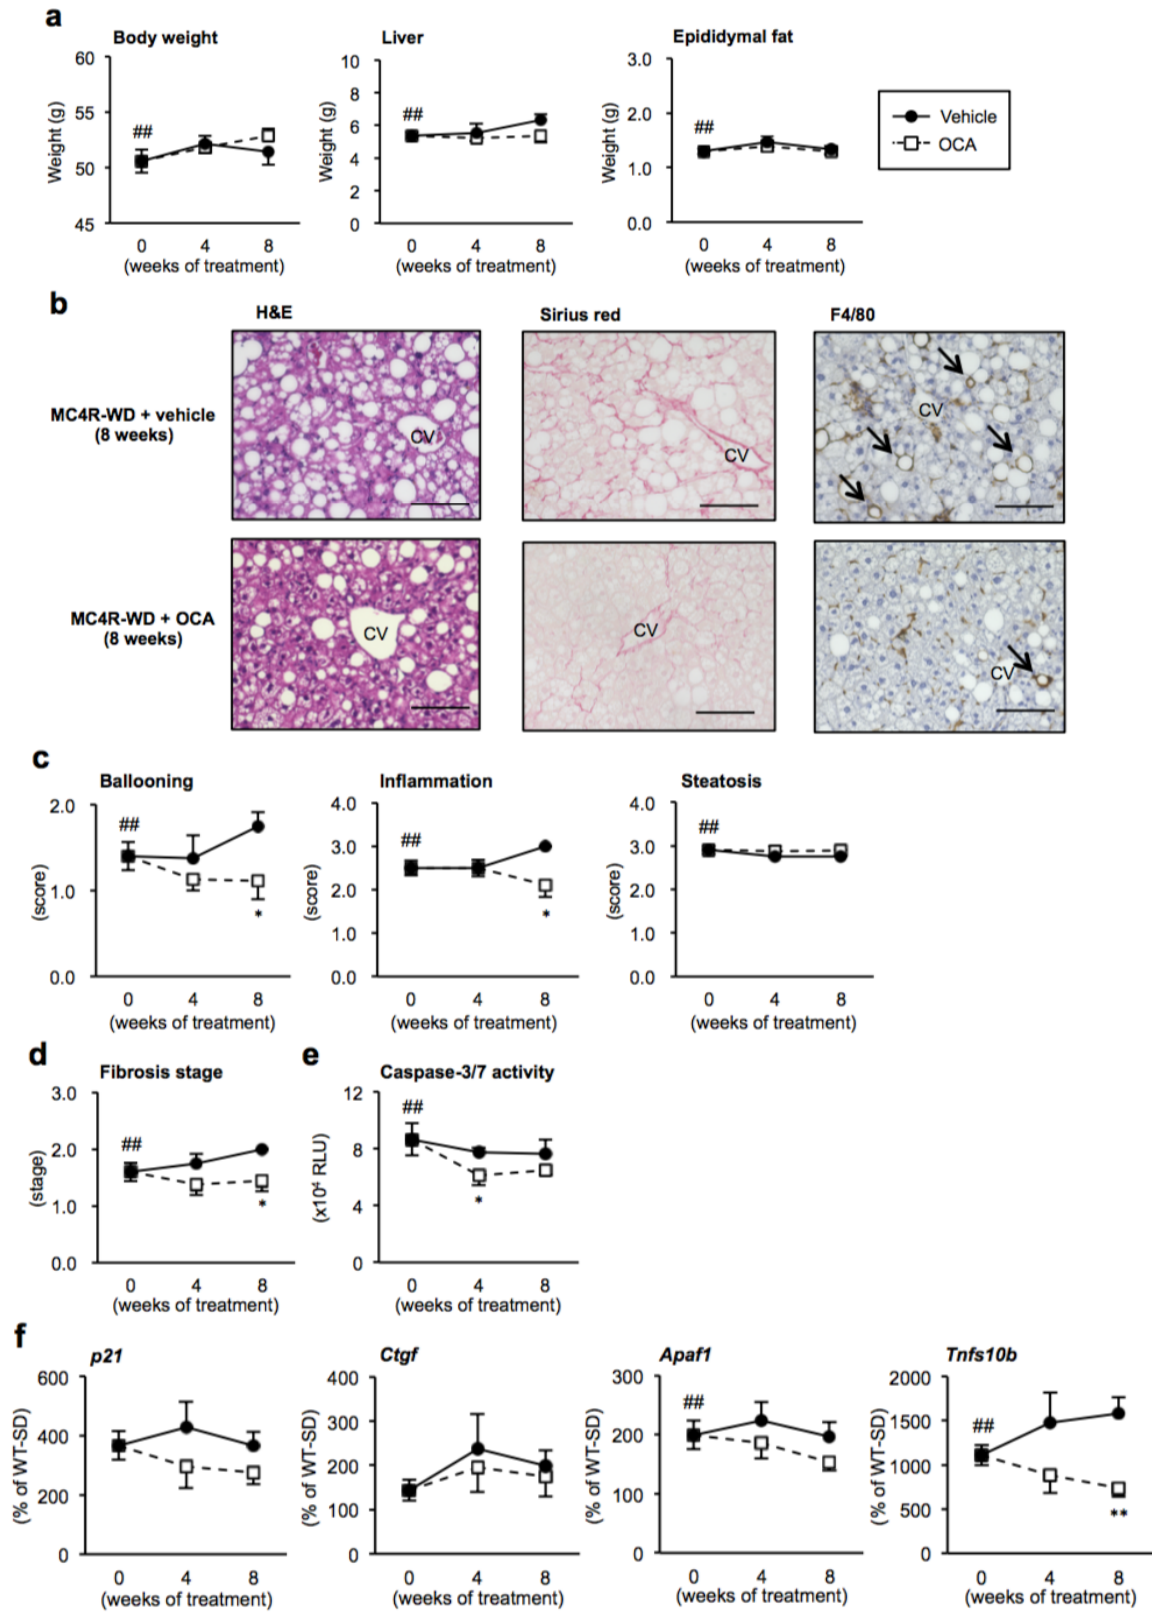

**Supplementary Figure S6. Effect of OCA on the progression of NASH in MC4R-KO mice.**

(a) Time course of body, liver and epididymal fat weights. (b) Representative images of Hematoxylin and eosin, Sirius red staining, and F4/80 immunostaining of the livers from WD-fed MC4R-KO mice treated with OCA for 8 weeks. Arrows, hCLS. Scale bars, 100  $\mu$ m. CV, central veins. Time course of ballooning, inflammation and steatosis scores (c), and fibrosis stage in the liver (d). Caspase-3/7 activity in the liver (e). (f) Time course of hepatic mRNA expression levels of *p21*, *Ctgf*, *Apaf1* and *Tnfs10b* after 4 or 8 weeks treatment with OCA.  $^{##}p < 0.01$  MC4R-WD (pre-treatment) vs. WT-SD.  $^{*}p < 0.05$ ,  $^{**}p < 0.01$  OCA-treated MC4R-WD group vs. vehicle-treated MC4R-WD group at each point. Open square, vehicle-treated MC4R-WD group (pretreatment,  $n = 10$ ; 4w and 8w,  $n = 8$ ); closed circle, OCA-treated MC4R-WD group (4w,  $n = 8$ ; 8w  $n = 9$ ). WT-SD,  $n = 7$ .

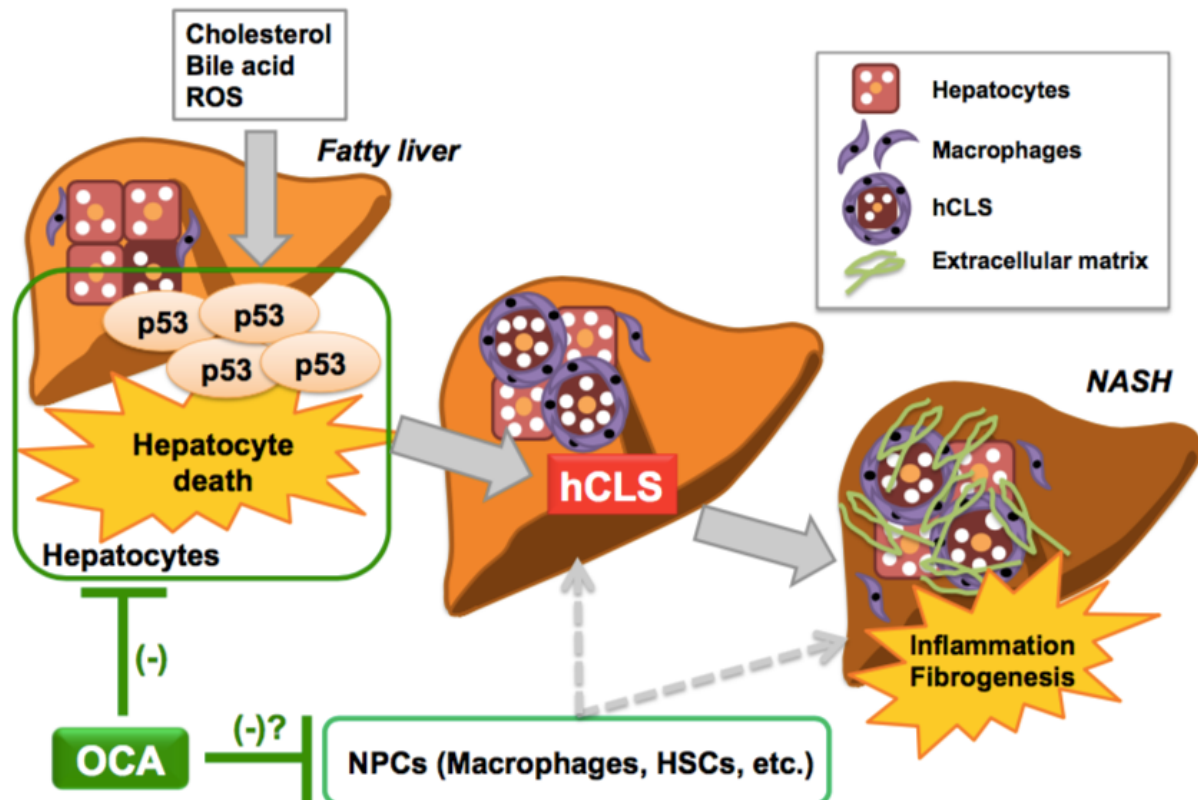

### Supplementary Figure S7. Graphical summary

hCLS, hepatic crown-like structure; HSC, hepatic stellate cell; NASH, non-alcoholic steatohepatitis; NPC, non-parenchymal cell; OCA, obeticholic acid; ROS, reactive oxygen species.

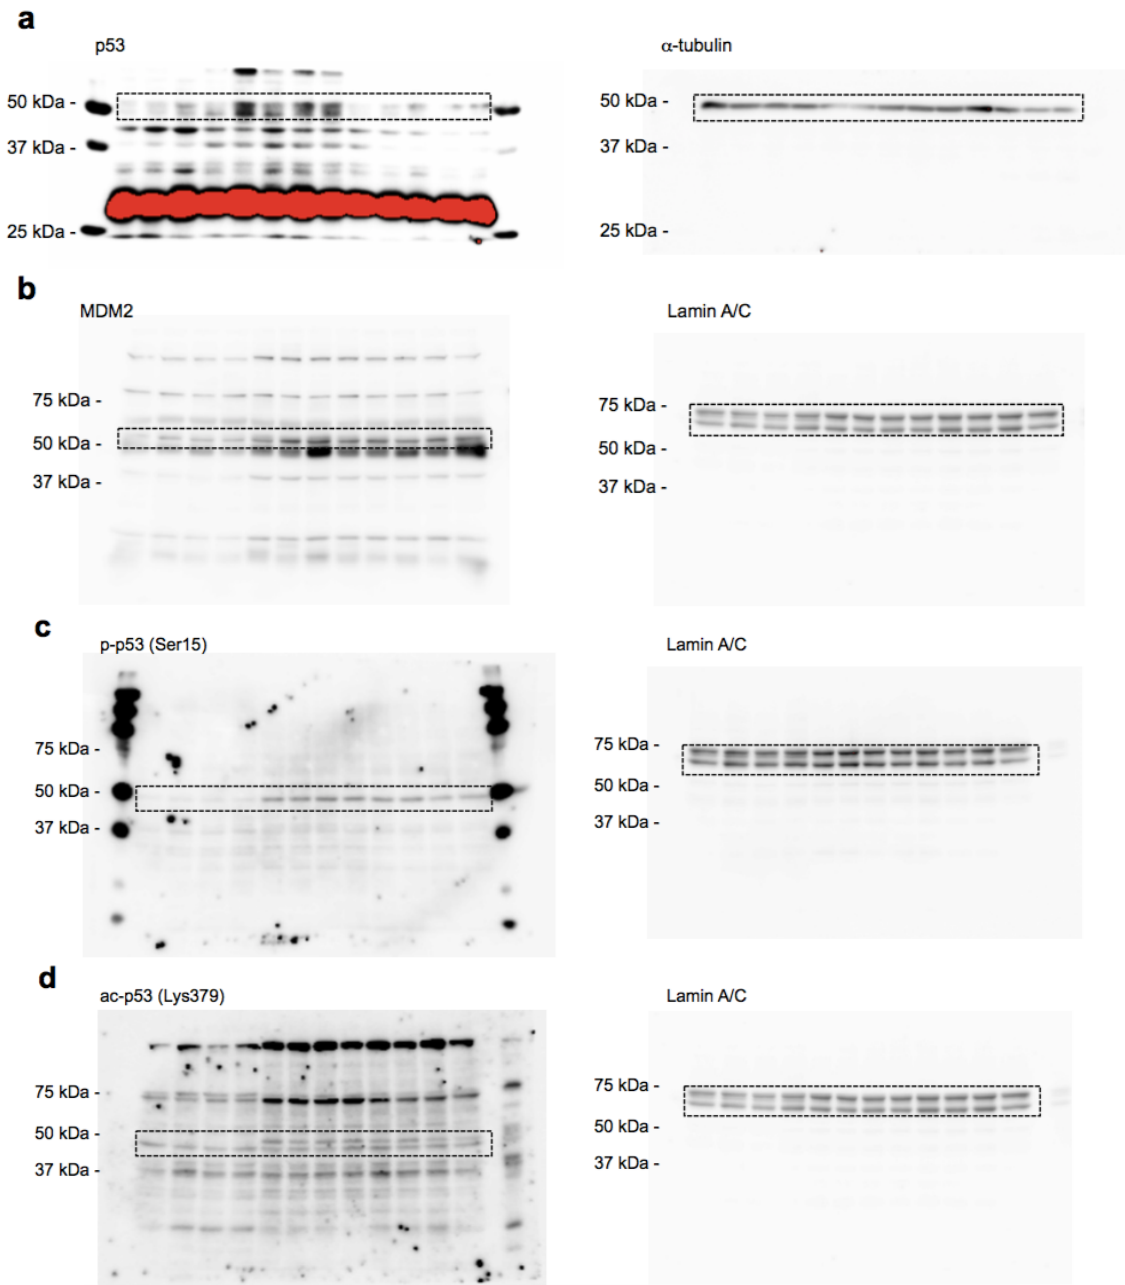

**Supplementary Figure S8. Uncropped Western blots for Fig. 3c and Supplementary Fig. S4.**

Boxes indicate cropped areas.
